# Supplementary material
Source: HighWire-hosted journal article supplement (https://drc.bmj.com/content/8/1/e000850)
Supplement: inline-supplementary-material-1 [file inline-supplementary-material-1.pdf]

**Supplementary Material**

Table S1. Mean and standard error of the genetic risk score (GRS) for T2D among all women with genetic data in the NHSII and DNBC.

| Variable                                    | Non-T2D |       |       | T2D |       |      | <i>P</i> -value <sup>a</sup> |
|---------------------------------------------|---------|-------|-------|-----|-------|------|------------------------------|
|                                             | #       | Mean  | STD   | #   | Mean  | STD  |                              |
| NHSII                                       |         |       |       |     |       |      |                              |
| GRS                                         | 1438    | 67.65 | 5.68  | 446 | 68.17 | 6.06 | 0.10                         |
| Pre-pregnancy BMI                           | 504     | 25.05 | 5.14  | 149 | 31.18 | 7.15 | < 0.001                      |
| AHEI after the index pregnancy <sup>b</sup> | 894     | 47.27 | 10.54 | 278 | 45.41 | 9.91 | 0.009                        |
| DNBC                                        |         |       |       |     |       |      |                              |
| GRS                                         | 395     | 67.11 | 5.56  | 155 | 67.82 | 5.60 | 0.50                         |
| Pre-pregnancy BMI                           | 395     | 26.15 | 4.93  | 155 | 30.26 | 6.33 | < 0.001                      |
| AHEI after the index pregnancy <sup>c</sup> | 395     | 51.94 | 9.44  | 155 | 50.68 | 9.32 | 0.14                         |

<sup>a</sup>*P*-values were obtained from t-test between the two groups.

<sup>b</sup>Derived from the earliest dietary assessment after the index pregnancy.

<sup>c</sup>Derived from the dietary assessment at the follow-up clinical exam in DNBC.

Table S2. Candidate single nuclear polymorphisms (SNPs) and their associations with the risk of type 2 diabetes among women who had gestational diabetes in the Nurses' Health Study II (NHSII, N = 1,884) and the Danish National Birth Cohort (DNBC, N = 550).

| SNP               | BP               | Chr      | Gene                    | Func      | type 2 diabetes risk allele | Reference allele | Confirmation in Scott et. al., 2017 <sup>1</sup> |                | Confirmation in Mahajan et. al., 2014 <sup>2</sup> |                | NHSI        |                          |             | DNBC        |                          |             | Pooled <sup>a</sup>      |             |                  |
|-------------------|------------------|----------|-------------------------|-----------|-----------------------------|------------------|--------------------------------------------------|----------------|----------------------------------------------------|----------------|-------------|--------------------------|-------------|-------------|--------------------------|-------------|--------------------------|-------------|------------------|
|                   |                  |          |                         |           |                             |                  | Relevant SNP                                     | R <sup>2</sup> | Relevant SNP                                       | R <sup>2</sup> | EAf         | RR (95% CI) <sup>b</sup> | P           | EAf         | RR (95% CI) <sup>b</sup> | P           | RR (95% CI)              | P           | P, FDR corrected |
| rs10923931        | 119975336        | 1        | NOTCH2                  | -         | T                           | G                |                                                  |                | rs10923931                                         | Same           | 0.11        | 1.03 (0.85, 1.23)        | 0.79        | 0.11        | 0.77 (0.55, 1.07)        | 0.12        | 0.96 (0.82, 1.12)        | 0.59        | 0.75             |
| rs243021          | 60357684         | 2        | BCL11A                  | -         | A                           | G                |                                                  |                | rs243088                                           | 0.88           | 0.47        | 0.99 (0.89, 1.11)        | 0.91        | 0.49        | 1.06 (0.87, 1.29)        | 0.56        | 1.01 (0.91, 1.12)        | 0.85        | 0.88             |
| rs2943641         | 226229029        | 2        | LOC64673, IRS1          | IR        | C                           | T                | rs2972156                                        | 0.91           | rs2943640                                          | 0.94           | 0.65        | 1.07 (0.95, 1.20)        | 0.30        | 0.65        | 1.10 (0.89, 1.34)        | 0.38        | 1.07 (0.97, 1.19)        | 0.18        | 0.59             |
| rs3923113         | 164645339        | 2        | GRB14                   | IR        | A                           | C                |                                                  |                | rs3923113                                          | Same           | 0.64        | 1.06 (0.94, 1.20)        | 0.34        | 0.63        | 1.19 (0.97, 1.47)        | 0.10        | 1.09 (0.98, 1.21)        | 0.10        | 0.39             |
| rs7578326         | 226155937        | 2        | IRS1                    | IR        | A                           | G                |                                                  |                |                                                    |                | 0.66        | 1.08 (0.96, 1.22)        | 0.20        | 0.77        | 1.06 (0.87, 1.30)        | 0.56        | 1.08 (0.97, 1.20)        | 0.16        | 0.56             |
| rs7578597         | 43505684         | 2        | THADA                   | BC        | T                           | C                | rs6757251                                        | 0.97           | rs10203174                                         | 0.91           | 0.90        | 1.07 (0.87, 1.31)        | 0.53        | 0.92        | 1.21 (0.83, 1.76)        | 0.33        | 1.10 (0.92, 1.32)        | 0.30        | 0.65             |
| rs7593730         | 160314943        | 2        | ITGB6/RBMS1             | IR        | C                           | T                |                                                  |                | rs7593730                                          | Same           | 0.78        | 1.06 (0.92, 1.22)        | 0.43        | 0.81        | 0.93 (0.74, 1.17)        | 0.54        | 1.02 (0.90, 1.15)        | 0.73        | 0.84             |
| rs7607980         | 164694691        | 2        | COBLL1                  | -         | T                           | C                |                                                  |                |                                                    |                | 0.86        | 1.10 (0.92, 1.30)        | 0.29        | 0.85        | 1.32 (0.97, 1.79)        | 0.08        | 1.15 (0.99, 1.33)        | 0.07        | 0.34             |
| rs16861329        | 186948673        | 3        | ST6GAL1                 | -         | C                           | T                |                                                  |                | rs16861329                                         | Same           | 0.87        | 1.13 (0.94, 1.36)        | 0.19        | 0.87        | 1.21 (0.91, 1.60)        | 0.18        | 1.03 (0.88, 1.20)        | 0.71        | 0.84             |
| rs1801282         | 12351626         | 3        | PPARG                   | IR        | C                           | G                | rs11712037                                       | 0.94           | rs1801282                                          | Same           | 0.88        | 1.00 (0.84, 1.20)        | 0.96        | 0.86        | 1.00 (0.76, 1.31)        | 0.99        | 1.00 (0.86, 1.16)        | 0.97        | 0.97             |
| rs4402960         | 185793899        | 3        | IGF2BP2                 | BC        | T                           | G                | rs4402960                                        | Same           | rs4402960                                          | Same           | 0.33        | 1.07 (0.95, 1.20)        | 0.29        | 0.32        | 1.06 (0.87, 1.30)        | 0.55        | 1.07 (0.96, 1.18)        | 0.22        | 0.59             |
| rs4607103         | 64726228         | 3        | ADAMTS9                 | IR        | C                           | T                |                                                  |                |                                                    |                | 0.77        | 0.94 (0.82, 1.07)        | 0.34        | 0.78        | 0.96 (0.77, 1.19)        | 0.70        | 0.94 (0.84, 1.06)        | 0.31        | 0.65             |
| <b>rs1801214</b>  | <b>6301295</b>   | <b>4</b> | <b>WFS1</b>             | <b>BC</b> | <b>T</b>                    | <b>C</b>         |                                                  |                | <b>rs4458523</b>                                   | <b>0.96</b>    | <b>0.60</b> | <b>1.15 (1.02, 1.30)</b> | <b>0.03</b> | <b>0.60</b> | <b>1.02 (0.85, 1.24)</b> | <b>0.81</b> | <b>1.11 (1.00, 1.23)</b> | <b>0.04</b> | <b>0.24</b>      |
| <b>rs4689388</b>  | <b>6268329</b>   | <b>4</b> | <b>WFS1</b>             | <b>BC</b> | <b>A</b>                    | <b>G</b>         |                                                  |                | <b>rs4458523</b>                                   | <b>0.85</b>    | <b>0.59</b> | <b>1.16 (1.03, 1.31)</b> | <b>0.02</b> | <b>0.58</b> | <b>1.04 (0.86, 1.26)</b> | <b>0.68</b> | <b>1.12 (1.02, 1.25)</b> | <b>0.02</b> | <b>0.24</b>      |
| rs6815464         | 1316113          | 4        | MAEA                    | BC        | C                           | G                |                                                  |                |                                                    |                | 0.97        | 1.05 (0.73, 1.51)        | 0.78        | 0.98        | 1.24 (0.72, 2.16)        | 0.44        | 0.97 (0.72, 1.31)        | 0.85        | 0.88             |
| rs4457053         | 77129124         | 5        | ZBED3                   | -         | G                           | A                |                                                  |                | rs6878122                                          | 0.93           | 0.31        | 1.06 (0.94, 1.20)        | 0.37        | 0.30        | 1.20 (0.96, 1.50)        | 0.12        | 1.00 (0.90, 1.12)        | 0.97        | 0.97             |
| rs1535500         | 39316274         | 6        | KCNK16                  | -         | T                           | G                |                                                  |                |                                                    |                | 0.50        | 0.95 (0.85, 1.06)        | 0.37        | 0.49        | 1.00 (0.83, 1.20)        | 0.97        | 0.96 (0.87, 1.06)        | 0.44        | 0.72             |
| rs7754840         | 20661019         | 6        | CDKAL1                  | BC        | C                           | G                |                                                  |                |                                                    |                | 0.33        | 0.97 (0.86, 1.10)        | 0.64        | 0.37        | 1.33 (1.10, 1.60)        | 0.00        | 1.06 (0.96, 1.18)        | 0.24        | 0.62             |
| <b>rs7766070</b>  | <b>20686342</b>  | <b>6</b> | <b>CDKAL1</b>           | <b>BC</b> | <b>A</b>                    | <b>C</b>         | <b>rs7451008</b>                                 | <b>0.97</b>    | <b>rs7756992</b>                                   | <b>0.98</b>    | <b>0.28</b> | <b>1.05 (0.93, 1.19)</b> | <b>0.45</b> | <b>0.32</b> | <b>1.28 (1.06, 1.54)</b> | <b>0.01</b> | <b>1.11 (1.00, 1.24)</b> | <b>0.04</b> | <b>0.24</b>      |
| <b>rs10229583</b> | <b>127606849</b> | <b>7</b> | <b>ARF5, PAX4, SND1</b> | <b>-</b>  | <b>G</b>                    | <b>A</b>         |                                                  |                | <b>rs10229583</b>                                  | <b>Same</b>    | <b>0.78</b> | <b>1.06 (0.92, 1.23)</b> | <b>0.39</b> | <b>0.77</b> | <b>1.31 (1.04, 1.65)</b> | <b>0.02</b> | <b>1.13 (1.00, 1.27)</b> | <b>0.05</b> | <b>0.27</b>      |
| rs849134          | 28156603         | 7        | JAZF1                   | BC        | A                           | G                | rs1635852                                        | 0.95           | rs849135                                           | 0.95           | 0.51        | 1.04 (0.93, 1.16)        | 0.53        | 0.45        | 0.99 (0.82, 1.20)        | 0.94        | 1.03 (0.93, 1.13)        | 0.62        | 0.75             |
| rs972283          | 130782095        | 7        | KLF14                   | IR        | G                           | A                | rs10954284                                       | 0.98           | rs13233731                                         | 0.95           | 0.54        | 1.05 (0.93, 1.18)        | 0.43        | 0.51        | 0.97 (0.80, 1.17)        | 0.74        | 1.03 (0.93, 1.13)        | 0.62        | 0.75             |
| rs13266634        | 117172544        | 8        | SLC30A8                 | BC        | C                           | T                | rs3802177                                        | Same           | rs3802177                                          | Same           | 0.72        | 0.96 (0.84, 1.09)        | 0.51        | 0.72        | 1.00 (0.82, 1.22)        | 1.00        | 0.97 (0.87, 1.08)        | 0.57        | 0.75             |
| rs896854          | 94948283         | 8        | TP53INP1                | -         | T                           | C                |                                                  |                | rs7845219                                          | 0.92           | 0.49        | 0.96 (0.86, 1.08)        | 0.54        | 0.45        | 1.07 (0.88, 1.29)        | 0.52        | 0.99 (0.90, 1.09)        | 0.84        | 0.88             |
| <b>rs10811661</b> | <b>22134095</b>  | <b>9</b> | <b>CDKN2A/B</b>         | <b>BC</b> | <b>T</b>                    | <b>C</b>         | <b>rs10965248</b>                                | <b>0.97</b>    | <b>rs10811661</b>                                  | <b>Same</b>    | <b>0.83</b> | <b>0.90 (0.78, 1.05)</b> | <b>0.19</b> | <b>0.85</b> | <b>0.75 (0.59, 0.95)</b> | <b>0.02</b> | <b>0.86 (0.76, 0.97)</b> | <b>0.02</b> | <b>0.24</b>      |
| <b>rs11787792</b> | <b>136357696</b> | <b>9</b> | <b>GPSM1</b>            | <b>-</b>  | <b>A</b>                    | <b>G</b>         | <b>rs11787792</b>                                | <b>Same</b>    |                                                    |                | <b>0.64</b> | <b>1.18 (1.04, 1.33)</b> | <b>0.01</b> | <b>0.66</b> | <b>0.99 (0.81, 1.22)</b> | <b>0.95</b> | <b>1.12 (1.01, 1.25)</b> | <b>0.03</b> | <b>0.24</b>      |
| rs13292136        | 79337213         | 9        | CHCHD9                  | -         | C                           | T                |                                                  |                |                                                    |                | 0.94        | 0.96 (0.76, 1.21)        | 0.72        | 0.94        | 1.47 (0.88, 2.47)        | 0.15        | 1.03 (0.83, 1.27)        | 0.80        | 0.88             |

| SNP              | BP              | Chr       | Gene                   | Func      | type 2 diabetes risk allele | Reference allele | Confirmation in Scott et al., 2017 <sup>1</sup> |                | Confirmation in Mahajan et al., 2014 <sup>2</sup> |                | NHSI        |                          |             | DNBC        |                          |             | Pooled <sup>a</sup>      |             |                  |
|------------------|-----------------|-----------|------------------------|-----------|-----------------------------|------------------|-------------------------------------------------|----------------|---------------------------------------------------|----------------|-------------|--------------------------|-------------|-------------|--------------------------|-------------|--------------------------|-------------|------------------|
|                  |                 |           |                        |           |                             |                  | Relevant SNP                                    | R <sup>2</sup> | Relevant SNP                                      | R <sup>2</sup> | EAF         | RR (95% CI) <sup>b</sup> | P           | EAF         | RR (95% CI) <sup>b</sup> | P           | RR (95% CI)              | P           | P, FDR corrected |
| rs7018475        | 22137686        | 9         | CDKN2B                 | BC        | T                           | G                |                                                 |                |                                                   |                | 0.73        | 1.11 (0.97, 1.27)        | 0.13        | 0.72        | 1.09 (0.88, 1.34)        | 0.42        | 1.10 (0.99, 1.24)        | 0.09        | 0.38             |
| <b>rs7020996</b> | <b>22129580</b> | <b>9</b>  | <b>CDKN2A/B</b>        | <b>BC</b> | <b>C</b>                    | <b>T</b>         |                                                 |                |                                                   |                | <b>0.87</b> | <b>0.88 (0.75, 1.03)</b> | <b>0.12</b> | <b>0.89</b> | <b>0.83 (0.64, 1.09)</b> | <b>0.18</b> | <b>0.87 (0.76, 1.00)</b> | <b>0.04</b> | <b>0.24</b>      |
| <b>rs7041847</b> | <b>4287466</b>  | <b>9</b>  | <b>GLIS3</b>           | <b>BC</b> | <b>A</b>                    | <b>G</b>         |                                                 |                | <b>rs7041847</b>                                  | <b>Same</b>    | <b>0.54</b> | <b>0.91 (0.81, 1.02)</b> | <b>0.10</b> | <b>0.52</b> | <b>0.87 (0.72, 1.04)</b> | <b>0.12</b> | <b>0.89 (0.81, 0.99)</b> | <b>0.03</b> | <b>0.24</b>      |
| rs10906115       | 12272998        | 10        | CDC123-CAMK1D          | BC        | A                           | G                |                                                 |                |                                                   |                | 0.61        | 1.01 (0.90, 1.15)        | 0.82        | 0.61        | 0.89 (0.74, 1.07)        | 0.22        | 0.97 (0.88, 1.08)        | 0.62        | 0.75             |
| rs1111875        | 92703125        | 10        | HHEX                   | BC        | C                           | T                |                                                 |                | rs1111875                                         | Same           | 0.61        | 0.97 (0.86, 1.09)        | 0.57        | 0.64        | 0.87 (0.71, 1.05)        | 0.15        | 0.94 (0.85, 1.04)        | 0.22        | 0.59             |
| rs11257655       | 12265895        | 10        | CDC123                 | BC        | T                           | C                | rs11257659                                      | 0.94           | rs11257655                                        | Same           | 0.21        | 0.97 (0.84, 1.12)        | 0.66        | 0.77        | 0.95 (0.76, 1.18)        | 0.61        | 0.96 (0.85, 1.08)        | 0.52        | 0.75             |
| rs4506565        | 112996282       | 10        | TCF7L2                 | BC        | T                           | A                | rs7903146                                       | 0.92           | rs7903146                                         | 0.92           | 0.35        | 1.08 (0.96, 1.22)        | 0.21        | 0.33        | 0.99 (0.81, 1.20)        | 0.89        | 1.05 (0.95, 1.17)        | 0.31        | 0.65             |
| rs10830963       | 92975544        | 11        | MTNR1B                 | BC        | G                           | C                | rs10830963                                      | Same           | rs10830963                                        | Same           | 0.32        | 0.95 (0.83, 1.09)        | 0.47        | 0.33        | 0.92 (0.75, 1.12)        | 0.41        | 0.94 (0.84, 1.05)        | 0.29        | 0.65             |
| rs1387153        | 92940662        | 11        | MTNR1B                 | BC        | T                           | C                |                                                 |                |                                                   |                | 0.33        | 0.95 (0.84, 1.08)        | 0.47        | 0.33        | 1.00 (0.82, 1.23)        | 0.98        | 0.97 (0.87, 1.08)        | 0.54        | 0.75             |
| rs1552224        | 72722053        | 11        | ARAP1/CENTD2           | BC        | A                           | C                | rs76550717                                      | 0.99           | rs1552224                                         | Same           | 0.86        | 1.11 (0.93, 1.31)        | 0.25        | 0.83        | 1.09 (0.84, 1.43)        | 0.52        | 1.10 (0.95, 1.27)        | 0.19        | 0.59             |
| rs2237892        | 2818521         | 11        | KCNQ1                  | BC        | C                           | T                |                                                 |                |                                                   |                | 0.93        | 0.98 (0.78, 1.23)        | 0.87        | 0.96        | 0.76 (0.52, 1.12)        | 0.17        | 0.92 (0.75, 1.12)        | 0.40        | 0.69             |
| rs2237897        | 2837316         | 11        | KCNQ1                  | BC        | C                           | T                | rs2237897                                       | Same           |                                                   |                | 0.96        | 0.90 (0.69, 1.18)        | 0.44        | 0.97        | 0.78 (0.50, 1.22)        | 0.27        | 0.87 (0.69, 1.09)        | 0.22        | 0.59             |
| <b>rs231356</b>  | <b>2684113</b>  | <b>11</b> | <b>KCNQ1</b>           | <b>BC</b> | <b>T</b>                    | <b>A</b>         |                                                 |                |                                                   |                | <b>0.28</b> | <b>1.09 (0.96, 1.24)</b> | <b>0.18</b> | <b>0.32</b> | <b>1.23 (1.02, 1.48)</b> | <b>0.03</b> | <b>1.13 (1.02, 1.26)</b> | <b>0.02</b> | <b>0.24</b>      |
| rs231362         | 2670241         | 11        | KCNQ1                  | BC        | G                           | A                |                                                 |                | rs231362                                          | Same           | 0.52        | 1.02 (0.91, 1.15)        | 0.76        | 0.52        | 1.11 (0.92, 1.34)        | 0.27        | 1.04 (0.95, 1.15)        | 0.40        | 0.69             |
| rs5215           | 17387083        | 11        | KCNJ11                 | BC        | C                           | T                | rs5219                                          | Same           | rs5215                                            | Same           | 0.37        | 0.98 (0.87, 1.10)        | 0.73        | 0.41        | 1.18 (0.98, 1.41)        | 0.08        | 1.03 (0.94, 1.14)        | 0.51        | 0.75             |
| rs1531343        | 65781114        | 12        | HMGA2                  | IR        | C                           | G                |                                                 |                | rs2261181                                         | 0.81           | 0.12        | 0.96 (0.80, 1.14)        | 0.62        | 0.12        | 0.96 (0.73, 1.26)        | 0.76        | 0.96 (0.82, 1.11)        | 0.55        | 0.75             |
| rs7305618        | 120965129       | 12        | HNF1A                  | BC        | C                           | T                |                                                 |                |                                                   |                | 0.78        | 0.91 (0.79, 1.05)        | 0.20        | 0.79        | 1.06 (0.85, 1.33)        | 0.60        | 0.95 (0.85, 1.07)        | 0.42        | 0.71             |
| rs7957197        | 121022883       | 12        | HNF1A                  | BC        | T                           | A                |                                                 |                | rs12427353                                        | 0.82           | 0.82        | 0.89 (0.77, 1.02)        | 0.10        | 0.16        | 1.17 (0.90, 1.50)        | 0.24        | 0.95 (0.84, 1.07)        | 0.39        | 0.69             |
| rs1359790        | 80143021        | 13        | SPRY2                  | BC        | G                           | A                | rs11616380                                      | 0.97           | rs1359790                                         | Same           | 0.74        | 1.00 (0.88, 1.14)        | 0.97        | 0.74        | 0.86 (0.70, 1.05)        | 0.13        | 0.95 (0.85, 1.06)        | 0.40        | 0.69             |
| rs7961581        | 71269322        | 13        | TSPAN8                 | BC        | C                           | T                | rs6581998                                       | 0.96           | rs7955901                                         | 0.99           | 0.30        | 0.97 (0.85, 1.11)        | 0.67        | 0.27        | 0.96 (0.77, 1.19)        | 0.69        | 0.97 (0.87, 1.08)        | 0.58        | 0.75             |
| rs11634397       | 80139880        | 15        | ZFAND6                 | -         | G                           | A                |                                                 |                | rs11634397                                        | Same           | 0.65        | 0.99 (0.88, 1.13)        | 0.93        | 0.62        | 1.06 (0.87, 1.31)        | 0.55        | 1.01 (0.91, 1.13)        | 0.82        | 0.88             |
| rs1436955        | 62112183        | 15        | C2CD4B (NLF2, FAM148B) | -         | C                           | T                |                                                 |                |                                                   |                | 0.74        | 0.99 (0.87, 1.13)        | 0.89        | 0.72        | 1.09 (0.87, 1.36)        | 0.44        | 1.02 (0.91, 1.14)        | 0.79        | 0.88             |
| <b>rs2028299</b> | <b>89831025</b> | <b>15</b> | <b>AP3S2</b>           | <b>BC</b> | <b>C</b>                    | <b>A</b>         |                                                 |                | <b>rs2028299</b>                                  | <b>Same</b>    | <b>0.29</b> | <b>1.18 (1.05, 1.34)</b> | <b>0.01</b> | <b>0.28</b> | <b>0.98 (0.79, 1.20)</b> | <b>0.82</b> | <b>1.12 (1.01, 1.25)</b> | <b>0.03</b> | <b>0.24</b>      |
| rs7172432        | 62104190        | 15        | C2CD4A, C2CD4B         | BC        | A                           | G                |                                                 |                | rs7163757                                         | 0.99           | 0.58        | 1.00 (0.89, 1.13)        | 0.97        | 0.55        | 1.15 (0.94, 1.42)        | 0.17        | 1.04 (0.94, 1.15)        | 0.47        | 0.73             |
| rs7178572        | 77454848        | 15        | HMG20A                 | -         | G                           | A                | rs952471                                        | 0.96           | rs7178572                                         | Same           | 0.71        | 1.01 (0.89, 1.16)        | 0.84        | 0.71        | 0.87 (0.71, 1.07)        | 0.18        | 0.97 (0.87, 1.08)        | 0.59        | 0.75             |
| rs11642841       | 53811575        | 16        | FTO                    | IR        | A                           | C                |                                                 |                |                                                   |                | 0.39        | 1.08 (0.96, 1.22)        | 0.19        | 0.38        | 1.01 (0.82, 1.25)        | 0.91        | 1.06 (0.95, 1.17)        | 0.28        | 0.65             |
| rs8042680        | 90978107        | 16        | PRC1                   | BC        | A                           | C                |                                                 |                |                                                   |                | 0.34        | 0.98 (0.86, 1.10)        | 0.69        | 0.70        | 0.89 (0.71, 1.10)        | 0.28        | 0.95 (0.86, 1.06)        | 0.38        | 0.69             |
| <b>rs4430796</b> | <b>37738049</b> | <b>17</b> | <b>HNF1B</b>           | <b>BC</b> | <b>G</b>                    | <b>A</b>         |                                                 |                | <b>rs4430796</b>                                  | <b>Same</b>    | <b>0.49</b> | <b>1.10 (0.98, 1.23)</b> | <b>0.12</b> | <b>0.47</b> | <b>1.17 (0.97, 1.41)</b> | <b>0.10</b> | <b>1.12 (1.01, 1.23)</b> | <b>0.03</b> | <b>0.24</b>      |

| SNP       | BP       | Chr | Gene  | Func | type 2 diabetes risk allele | Reference allele | Confirmation in Scott et. al., 2017 <sup>1</sup> |                | Confirmation in Mahajan et. al., 2014 <sup>2</sup> |                | NHSI |                          |      | DNBC |                          |      | Pooled <sup>a</sup> |          | <i>P</i> , FDR corrected |
|-----------|----------|-----|-------|------|-----------------------------|------------------|--------------------------------------------------|----------------|----------------------------------------------------|----------------|------|--------------------------|------|------|--------------------------|------|---------------------|----------|--------------------------|
|           |          |     |       |      |                             |                  | Relevant SNP                                     | R <sup>2</sup> | Relevant SNP                                       | R <sup>2</sup> | EAF  | RR (95% CI) <sup>b</sup> | P    | EAF  | RR (95% CI) <sup>b</sup> | P    | RR (95% CI)         | <i>P</i> |                          |
| rs8050136 | 53782363 | 17  | FTO   | IR   | A                           | C                | rs1558902                                        | 0.92           | rs9936385                                          | 0.99           | 0.39 | 1.11 (0.99, 1.25)        | 0.08 | 0.39 | 1.01 (0.83, 1.25)        | 0.89 | 1.09 (0.98, 1.20)   | 0.11     | 0.41                     |
| rs3786897 | 33402102 | 19  | PEPD  | IR   | A                           | G                |                                                  |                | rs3786897                                          | Same           | 0.59 | 1.10 (0.98, 1.24)        | 0.12 | 0.59 | 1.07 (0.89, 1.30)        | 0.47 | 1.05 (0.95, 1.16)   | 0.34     | 0.69                     |
| rs8090011 | 7068463  | 19  | LAMA1 | -    | G                           | C                | rs7234111                                        | 0.90           |                                                    |                | 0.38 | 1.01 (0.89, 1.14)        | 0.90 | 0.38 | 1.34 (1.11, 1.61)        | 0.00 | 1.09 (0.99, 1.21)   | 0.08     | 0.36                     |
| rs4812829 | 44360627 | 20  | HNF4A | BC   | A                           | G                |                                                  |                | rs4812829                                          | Same           | 0.17 | 0.92 (0.79, 1.07)        | 0.29 | 0.21 | 1.03 (0.81, 1.30)        | 0.82 | 0.95 (0.83, 1.08)   | 0.45     | 0.72                     |

<sup>a</sup>Meta-analyzed results from the two cohorts using fixed effects models weighted by inverse variance of the estimates.

<sup>b</sup>Estimated in log-binomial models adjusting for women's age.

Abbreviates: SNP – single nuclear polymorphism; Chr – chromosome; Func – functional annotation; GWAS – genome-wide association studies; EAF – effective allele frequency; RR – relative risk; CI – confidence interval; FDR – false discovery rate.

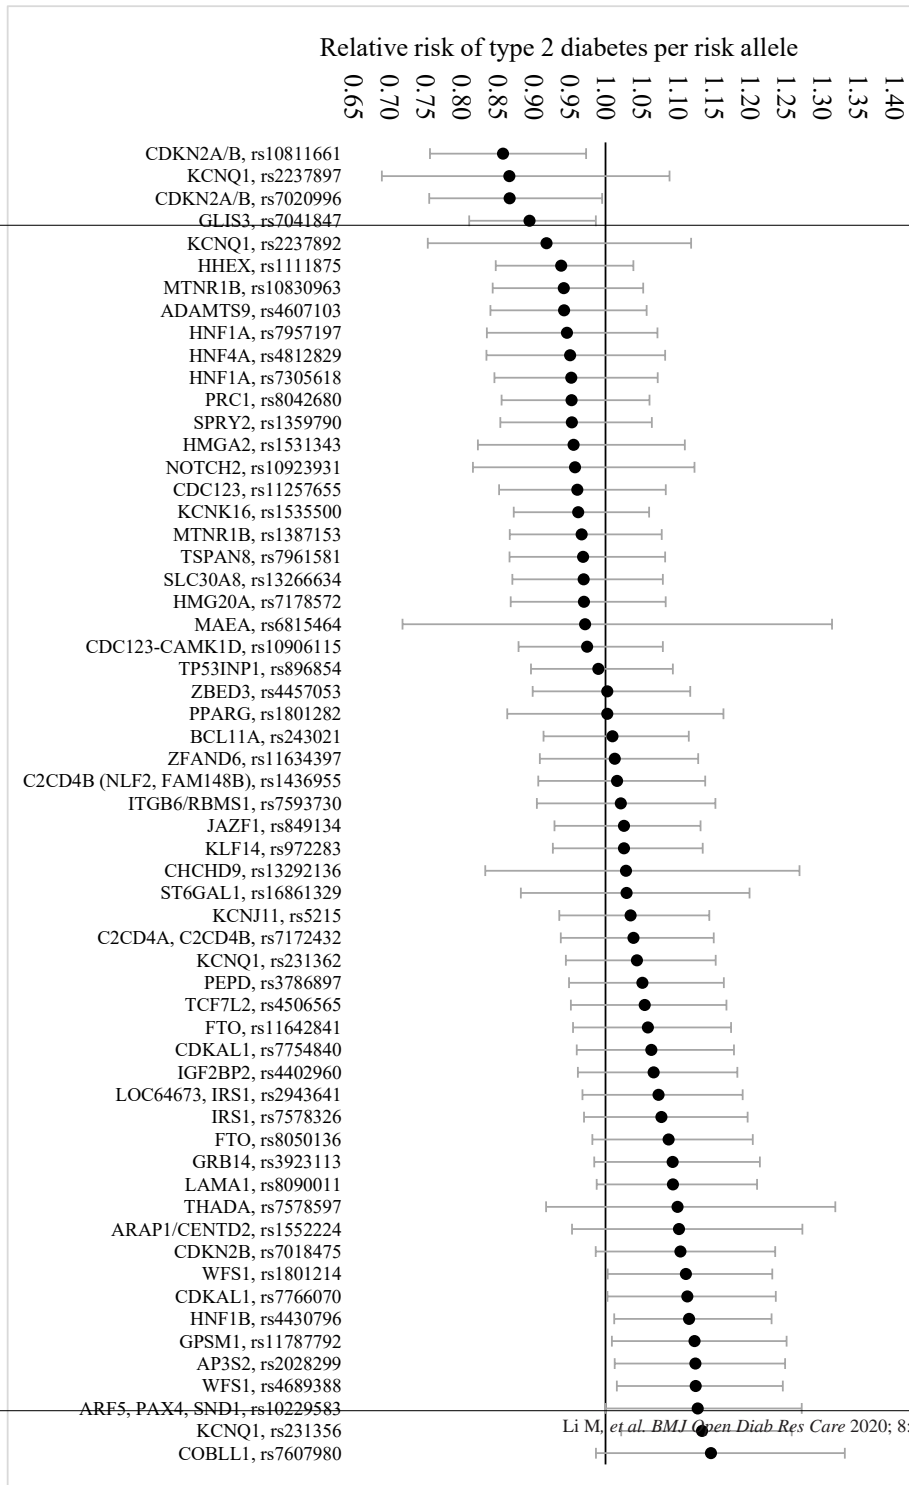

Figure S1. Relative risks and 95% confidence intervals<sup>a</sup> of type 2 diabetes associated with single nuclear polymorphism (SNP) among women who had gestational diabetes in the Nurses' Health Study II (NHSII, N=1,884) and the Danish National Birth Cohort (DNBC, N=550).

<sup>a</sup>The RRs were estimated using log-binomial models adjusting for women's age in each cohort, and then meta-analyzed using fixed effects models weighted by inverse variance of the estimates.

Table S3. Relative risks (95% confidence interval)<sup>a</sup> of type 2 diabetes associated with the genetic risk scores for beta-cell function (GRS<sub>BC</sub>) and insulin resistance (GRS<sub>IR</sub>) among women who had gestational diabetes in the Nurses' Health Study II (NHSII, N = 1,884) and the Danish National Birth Cohort (DNBC, N = 550).

|                     |             | Quartiles of GRS |                   |                   |                   | P-trend | Per five allele increment |
|---------------------|-------------|------------------|-------------------|-------------------|-------------------|---------|---------------------------|
|                     |             | Quartile 1       | Quartile 2        | Quartile 3        | Quartile 4        |         |                           |
| GRS <sub>BC</sub>   |             |                  |                   |                   |                   |         |                           |
| NHSII               | Range       | 17.0-35.0        | 35.0-38.0         | 38.0-41.0         | 41.0-51.0         |         |                           |
|                     | Case/total  | 120/477 (25.2)   | 103/502 (20.5)    | 93/380 (24.5)     | 130/525 (24.8)    |         |                           |
|                     | RR (95% CI) | 1.00             | 0.82 (0.65, 1.03) | 0.99 (0.78, 1.25) | 1.01 (0.82, 1.26) | 0.65    | 1.03 (0.94, 1.14)         |
| DNBC                | Range       | 24.0-35.0        | 35.0-38.0         | 38.1-41.0         | 41.2-52.6         |         |                           |
|                     | Case/total  | 42/165 (25.5)    | 45/156 (28.8)     | 36/119 (30.3)     | 32/110 (29.1)     |         |                           |
|                     | RR (95% CI) | 1.00             | 1.14 (0.80, 1.63) | 1.18 (0.82, 1.72) | 1.15 (0.78, 1.70) | 0.43    | 1.07 (0.91, 1.25)         |
| Pooled <sup>b</sup> | RR (95% CI) | 1.00             | 0.90 (0.75, 1.10) | 1.04 (0.85, 1.27) | 1.04 (0.86, 1.26) | 0.44    | 1.04 (0.96, 1.13)         |
| GRS <sub>IR</sub>   |             |                  |                   |                   |                   |         |                           |
| NHSII               | Range       | 0.0-11.0         | 11.0-13.0         | 13.0-14.3         | 14.4-22.0         |         |                           |
|                     | Case/total  | 98/543 (18.1)    | 86/319 (27.0)     | 150/563 (26.6)    | 112/459 (24.4)    |         |                           |
|                     | RR (95% CI) | 1.00             | 1.46 (1.14, 1.89) | 1.48 (1.18, 1.85) | 1.35 (1.06, 1.72) | 0.01    | 1.23 (1.06, 1.42)         |
| DNBC                | Range       | 5.5-11.0         | 12.0-13.0         | 13.2-14.7         | 15.0-22.0         |         |                           |
|                     | Case/total  | 47/173 (27.2)    | 46/162 (28.4)     | 19/78 (24.4)      | 43/137 (31.4)     |         |                           |
|                     | RR (95% CI) | 1.00             | 1.06 (0.75, 1.50) | 0.90 (0.57, 1.42) | 1.18 (0.84, 1.67) | 0.47    | 1.03 (0.78, 1.35)         |
| Pooled <sup>b</sup> | RR (95% CI) | 1.00             | 1.31 (1.07, 1.60) | 1.34 (1.10, 1.64) | 1.29 (1.06, 1.58) | 0.01    | 1.18 (1.03, 1.34)         |

<sup>a</sup>Estimated in log-binomial models adjusting for women's age.

<sup>b</sup>Meta-analyzed results from the two cohorts using fixed effects models weighted by inverse variance of the estimates.

**References**

1. Scott RA, Scott LJ, Mägi R, et al. An Expanded Genome-Wide Association Study of Type 2 Diabetes in Europeans. *Diabetes*. 2017;db161253.
2. Mahajan A, Go MJ, Zhang W, et al. Genome-wide trans-ancestry meta-analysis provides insight into the genetic architecture of type 2 diabetes susceptibility. In: NIH Public Access; 2014
